# Supplementary material for: Algerian Workers’ Exposure to Mycotoxins—A Biomonitoring Study
Source: MDPI journal article supplement (doi:10.3390/ijerph20166566), 2023-08-12
Supplement: s1 [file s1]

## Algerian Workers' Exposure to Mycotoxins—A Biomonitoring Study

Marta I. Mendes <sup>1</sup> , Sara C. Cunha <sup>1,\*</sup> , Iméne Rebai <sup>2</sup> and José O. Fernandes <sup>1,\*</sup>

1 LAQV-REQUIMTE, Laboratory of Bromatology and Hydrology, Department of Chemical Sciences, Faculty of Pharmacy, University of Porto, 4050-313 Porto, Portugal; up201809668@ff.up.pt

2 Laboratory of Toxicology, Faculty of Medicine, Salah Boubnider University 3, Constantine 5000, Algeria; imene.rebai@univ-constantine3.dz

\* Correspondence: sara.cunha@ff.up.pt (S.C.C.); josefer@ff.up.pt (J.O.F.);

Tel.: +351-220428639 (S.C.C.)

**Table S1-** Sample characterization

| SAMPLE N° | AGE | BMI   | HABITATION | SAMPLE N° | AGE | BMI   | HABITATION | SAMPLE N° | AGE | BMI   | HABITATION |
|-----------|-----|-------|------------|-----------|-----|-------|------------|-----------|-----|-------|------------|
| 1         | 40  | 22.64 | RURAL      | 1         | 53  | 24.07 | URBAN      | 65        | 33  | 25.80 | URBAN      |
| 2         | 58  | 24.57 | RURAL      | 2         | 41  | 27.16 | URBAN      | 66        | 35  | 16.69 | URBAN      |
| 3         | 43  | 22.22 | URBAN      | 3         | 48  | 26.83 | URBAN      | 67        | 38  | 22.49 | URBAN      |
| 4         | 38  | 26.85 | URBAN      | 4         | 39  | 28.09 | URBAN      | 68        | 47  | 24.66 | URBAN      |
| 5         | 49  | 22.09 | URBAN      | 5         | 52  | 23.74 | URBAN      | 69        | 39  | 29.32 | URBAN      |
| 6         | 52  | 25.69 | RURAL      | 6         | 35  | 26.57 | URBAN      | 70        | 29  | 26.78 | URBAN      |
| 7         | 44  | 25.76 | URBAN      | 7         | 29  | 23.46 | URBAN      | 71        | 36  | 18.76 | URBAN      |
| 8         | 57  | 30.46 | URBAN      | 8         | 32  | 26.03 | URBAN      | 72        | 58  | 23.88 | URBAN      |
| 9         | 44  | 26.85 | URBAN      | 9         | 32  | 26.12 | URBAN      | 73        | 36  | 16.01 | URBAN      |
| 10        | 49  | 26.23 | RURAL      | 10        | 48  | 29.75 | URBAN      | 74        | 28  | 24.80 | URBAN      |
| 11        | 39  | 24.59 | URBAN      | 11        | 43  | 23.96 | URBAN      | 75        | 33  | 26.53 | RURAL      |
| 12        | 49  | 24.07 | URBAN      | 12        | 50  | 23.96 | RURAL      | 76        | 48  | 27.34 | URBAN      |
| 13        | 52  | 24.22 | RURAL      | 13        | 32  | 26.03 | URBAN      | 77        | 52  | 25.88 | URBAN      |
| 14        | 35  | 21.63 | URBAN      | 14        | 39  | 23.31 | URBAN      | 78        | 36  | 24.64 | RURAL      |
| 15        | 47  | 21.30 | URBAN      | 15        | 57  | 30.46 | URBAN      | 79        | 29  | 21.88 | URBAN      |
| 16        | 45  | 28.62 | URBAN      | 16        | 34  | 24.30 | -          | 80        | 45  | 25.00 | URBAN      |
| 17        | 58  | 25.54 | URBAN      | 17        | 42  | 27.16 | URBAN      | 81        | 35  | 26.87 | URBAN      |
| 18        | 39  | 23.18 | URBAN      | 18        | 35  | 23.89 | URBAN      | 82        | 49  | 30.72 | URBAN      |
| 19        | 50  | 21.45 | RURAL      | 19        | 47  | 20.28 | URBAN      | 83        | 59  | 21.22 | URBAN      |
| 20        | 37  | 22.21 | URBAN      | 20        | 46  | 27.74 | URBAN      | 84        | 35  | 22.20 | URBAN      |
| 21        | 39  | 30.30 | URBAN      | 21        | 39  | 24.82 | URBAN      | 85        | 41  | 24.77 | URBAN      |
| 22        | 44  | 24.54 | URBAN      | 22        | 45  | 26.83 | RURAL      | 86        | 45  | 25.53 | URBAN      |
| 23        | 47  | 25.31 | URBAN      | 23        | 42  | 21.97 | URBAN      | 87        | 42  | 26.12 | URBAN      |
| 24        | 44  | 23.55 | URBAN      | 24        | 33  | 34.60 | RURAL      | 88        | 45  | 20.90 | URBAN      |
| 25        | 46  | 25.21 | RURAL      | 25        | 32  | 22.96 | URBAN      | 89        | 54  | 25.14 | URBAN      |
| 26        | 34  | 27.78 | URBAN      | 26        | 46  | 27.44 | URBAN      | 90        | 44  | 25.93 | URBAN      |
| 27        | 51  | 19.52 | URBAN      | 27        | 60  | 22.77 | URBAN      | 91        | 47  | 26.30 | URBAN      |
| 28        | 41  | 24.22 | RURAL      | 28        | 38  | 20.66 | URBAN      | 92        | 45  | 24.61 | URBAN      |
| 29        | 60  | 30.00 | URBAN      | 29        | 28  | 20.28 | URBAN      | 93        | 34  | 18.59 | URBAN      |
| 30        | 36  | 18.59 | URBAN      | 30        | 49  | 25.50 | URBAN      | 94        | 46  | 22.22 | URBAN      |
| 31        | 42  | 21.80 | URBAN      | 31        | 49  | 24.65 | URBAN      | 95        | 53  | 27.59 | URBAN      |
| 32        | 34  | 25.00 | URBAN      | 32        | 40  | 26.73 | URBAN      | 96        | 45  | 26.12 | URBAN      |

**Table S2-** LC-MS/MS parameters for the mycotoxins analysed

| Mycotoxin                         | Retention time (min) | Precursor ion (Da) | Product ions (Da) | Cone energy (V) | Collision energy (kV) |
|-----------------------------------|----------------------|--------------------|-------------------|-----------------|-----------------------|
| <sup>13</sup> C <sub>15</sub> DON | 7.30                 | 312.2              | 198.0             | 20              | 27                    |
|                                   |                      |                    | 265.0             | 20              | 27                    |
|                                   |                      |                    | 292.0             | 20              | 20                    |
| DON                               | 9.8                  | 297.0              | 203.3             | 22              | 13                    |
| OTAd5                             | 7.13                 | 409.0              | 249.0             | 20              | 11                    |
|                                   |                      |                    | 239.0             | 32              | 22                    |
|                                   |                      |                    | 363.0             | 32              | 22                    |
| OTA                               | 7.19                 | 404.0              | 239.1             | 28              | 24                    |
| FB <sub>1</sub>                   | 6.65                 | 722.5              | 358.1             | 26              | 18                    |
|                                   |                      |                    | 334.2             | 46              | 40                    |
|                                   |                      |                    | 352.4             | 44              | 36                    |
| AFB <sub>1</sub>                  | 6.2                  | 313.0              | 241.4             | 47              | 36                    |
| AFB <sub>2</sub>                  | 6.14                 | 315.0              | 285.3             | 47              | 23                    |
|                                   |                      |                    | 259.2             | 47              | 29                    |
|                                   |                      |                    | 287.3             | 50              | 27                    |
| T-2                               | 6.96                 | 484.0              | 214.5             | 21              | 18                    |
| HT-2                              | 6.65                 | 441.9              | 245.2             | 23              | 15                    |
|                                   |                      |                    | 215.3             | 16              | 12                    |
|                                   |                      |                    | 263.2             | 16              | 13                    |
| DON-3-G                           | 7.70                 | 493.0              | 326.0             | 80              | 35                    |
| DOM-1                             | 8.19                 | 281.0              | 382.0             | 80              | 27                    |
|                                   |                      |                    | 440.0             | 82              | 25                    |
|                                   |                      |                    | 109.0             | 15              | 15                    |
|                                   |                      |                    | 148.0             | 15              | 15                    |
| $\alpha$ -ZEL                     | 9.54                 | 321.1              | 245.0             | 15              | 15                    |
|                                   |                      |                    | 285.0             | 15              | 12                    |
|                                   |                      |                    | 303.0             | 13              | 10                    |
| ZEN                               | 7.36                 | 321.0              | 304.0             | 13              | 10                    |
|                                   |                      |                    | 189.0             | 22              | 15                    |
|                                   |                      |                    | 302.7             | 20              | 15                    |

<sup>13</sup>C<sub>15</sub>DON, 13 C15deoxynivalenol; DON, deoxynivalenol; OTAd5, ochratoxin A-(phenyl-d5); OTA, ochratoxin A; FB<sub>1</sub>, fumonisin B<sub>1</sub>; AFB<sub>1</sub>, aflatoxin B<sub>1</sub>; AFB<sub>2</sub>, aflatoxin B<sub>2</sub>; T-2, T-2 toxin; HT-2, HT-2 toxin; DON-3-G, deoxynivalenol-3-glucoside; DOM-1, deepoxy-deoxynivalenol;  $\alpha$ -ZEL,  $\alpha$ -zearealenol; ZEN, zearealenone.

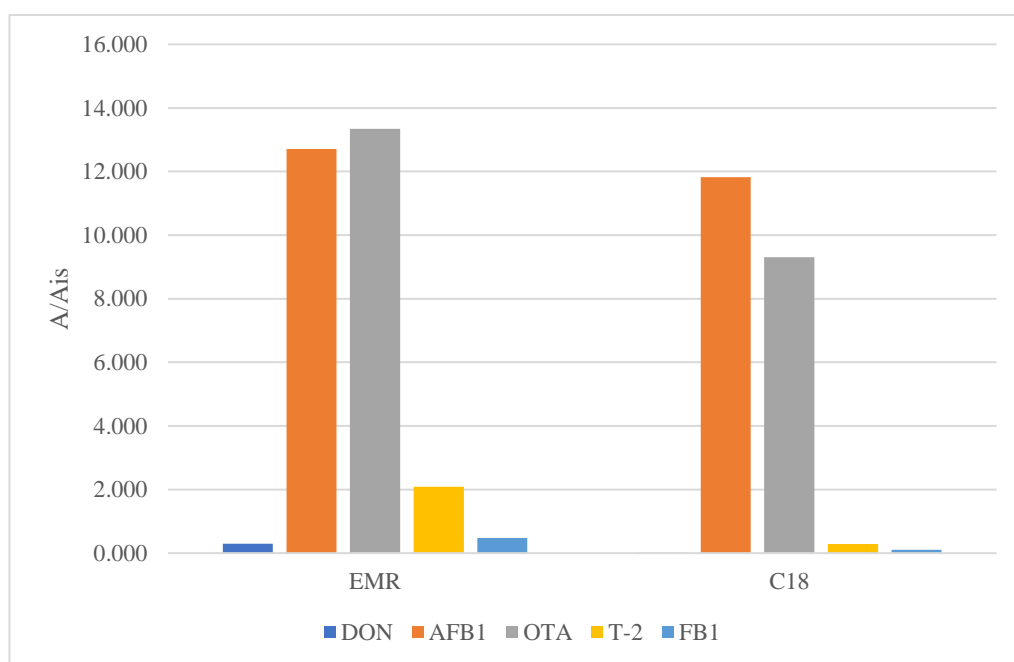

**Figure S1-** Comparison of sorbents and extraction solvents in QuEChERS extraction

DON, deoxynivalenol; AFB<sub>1</sub>, aflatoxin B<sub>1</sub>; OTA, ochratoxin A; T-2, T-2 toxin; FB1, fumonisin B1
